# Supplementary material for: USP30 deubiquitylates mitochondrial Parkin substrates and restricts apoptotic cell death
Source: PubMed Central journal article supplement (PMC4428036; doi:10.15252/embr.201439820), 2015-03-04
Supplement: embr0016-0618-sd3.pdf [file embr0016-0618-sd3.pdf]

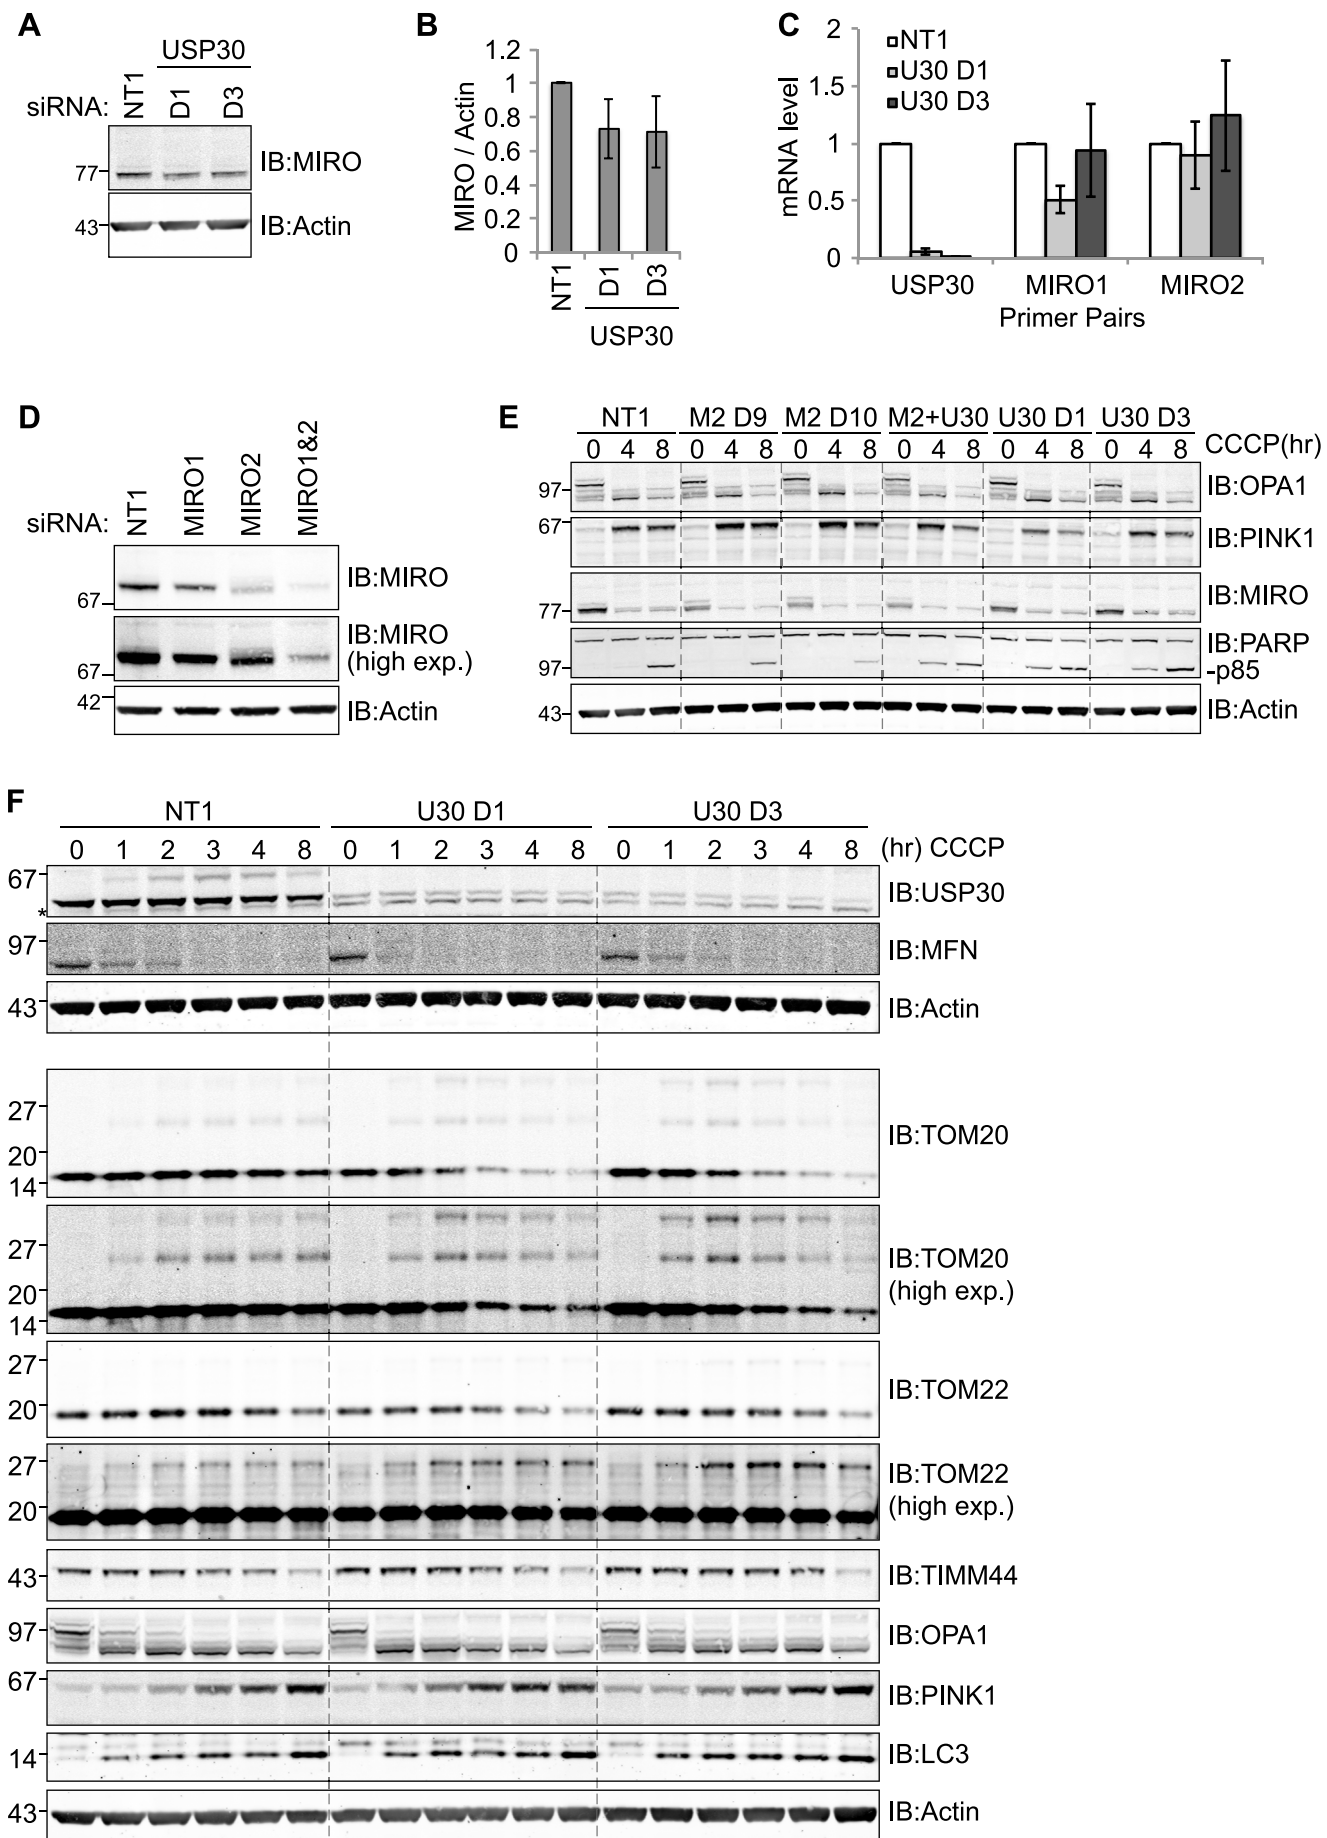

Liang et al. Supplementary Figure 3
