# Supplementary material for: USP30 deubiquitylates mitochondrial Parkin substrates and restricts apoptotic cell death
Source: PubMed Central journal article supplement (PMC4428036; doi:10.15252/embr.201439820), 2015-03-04
Supplement: embr0016-0618-sd16.pdf [file embr0016-0618-sd16.pdf]

Manuscript EMBOR-2014-39820

## **USP30 deubiquitylates mitochondrial Parkin substrates and restricts apoptotic cell death**

Jin-Rui Liang, Aitor Martinez, Jon D. Lane, Ugo Mayor, Michael J. Clague and Sylvie Urbe

*Corresponding author: Sylvie Urbe and Michael J. Clague, University of Liverpool*

---

### **Review timeline:**

Submission date:

31 October 2014

Accepted:

11 February 2015

---

### **Transaction Report:**

(Note: No Peer Review Process File is available with this article, as the authors have chosen not to make the review process public in this case.)
