# Supplementary material for: USP30 deubiquitylates mitochondrial Parkin substrates and restricts apoptotic cell death
Source: PubMed Central journal article supplement (PMC4428036; doi:10.15252/embr.201439820), 2015-03-04

Fig 2A

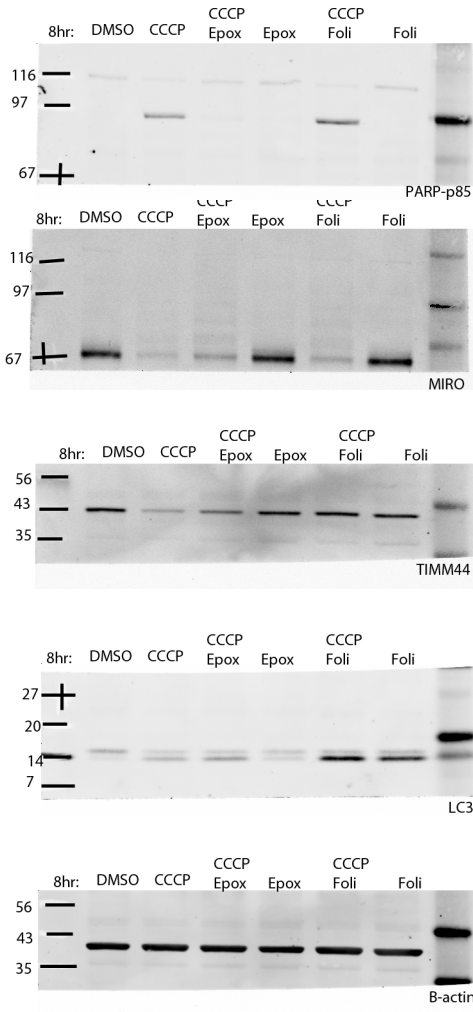

Fig 2C

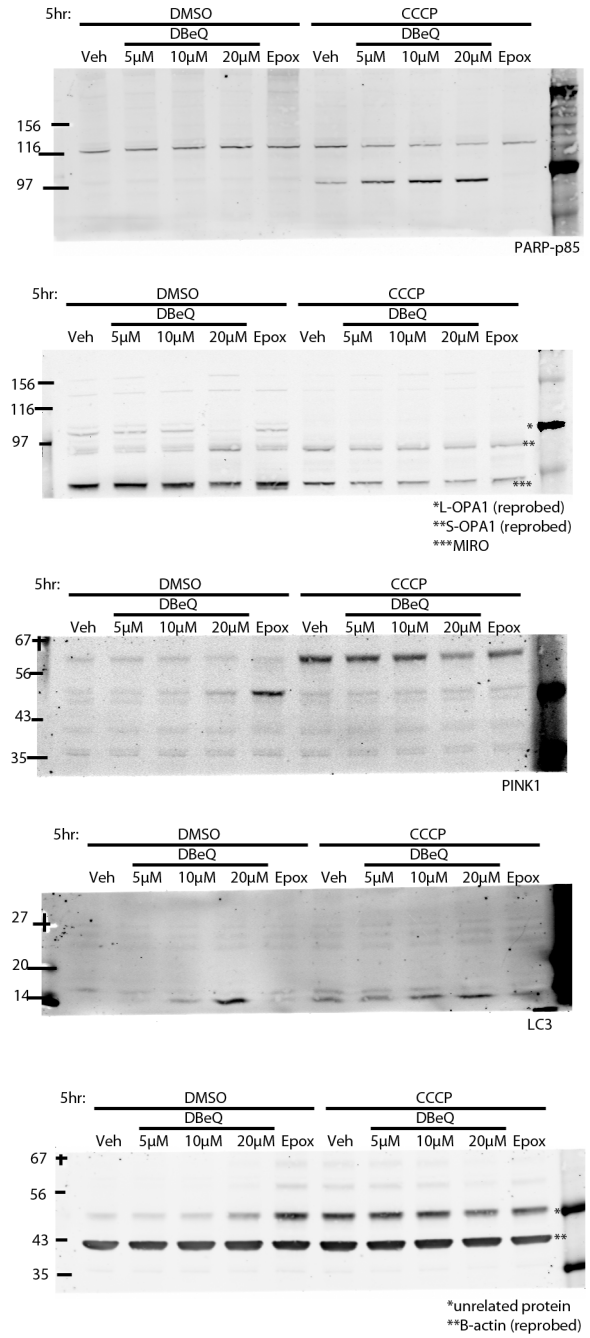

Supplement: embr0016-0618-sd18.pdf [file embr0016-0618-sd18.pdf]
